# Supplementary material
Source: Research Square preprint supplement (doi:10.21203/rs.3.rs-9349992/v1)
Supplement: Supplementary file 1 [file 345318b6d88c984e944511e5.docx]

**Supplementary material**

**
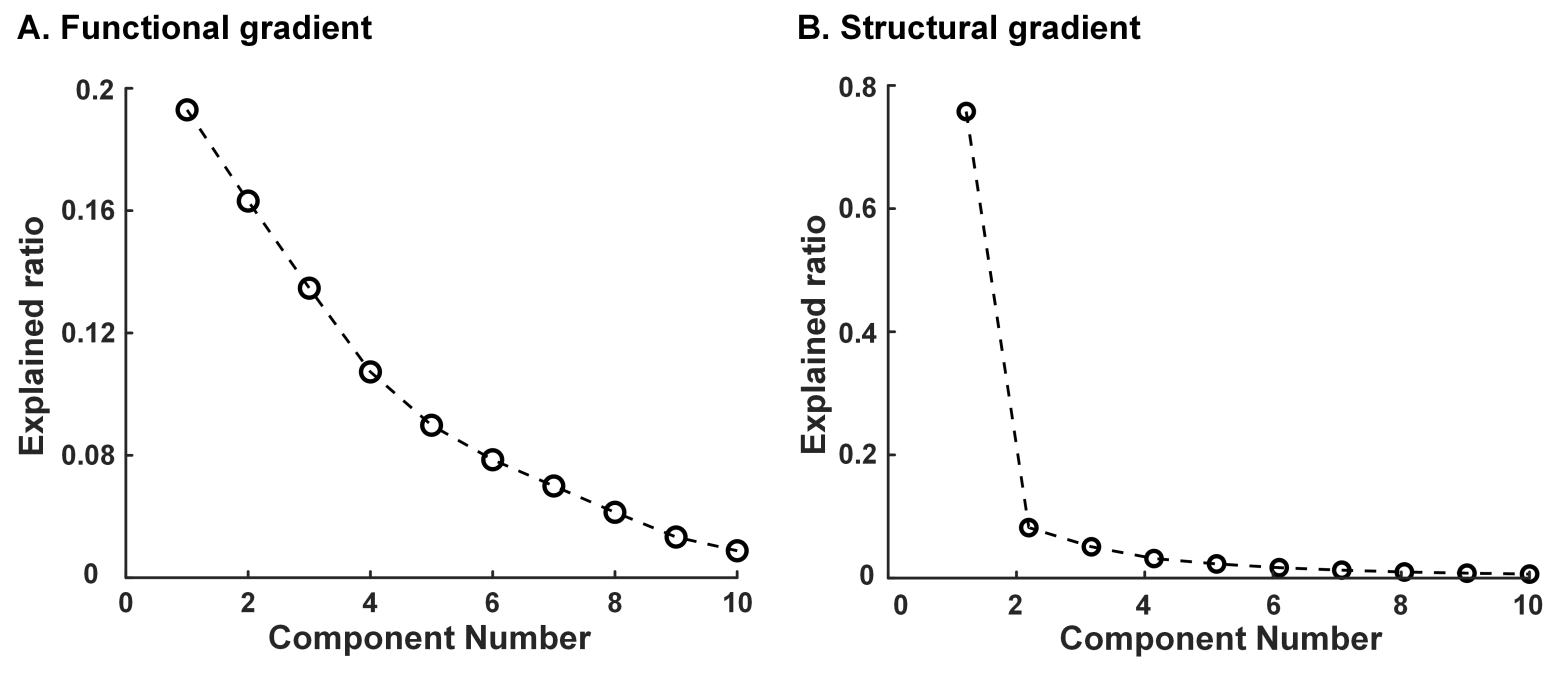
**

**Figure S1. Scree plot of the first 10 components.** (A) and (B) The average explained ratio of the first 10 diffusion embedding components of the functional and structural gradients. (A) The principal functional gradient explained approximately 20% of the total connectivity variance. (B) The principal and secondary structural gradients explained approximately 76% and 8% of the total connectivity variance, respectively.

**
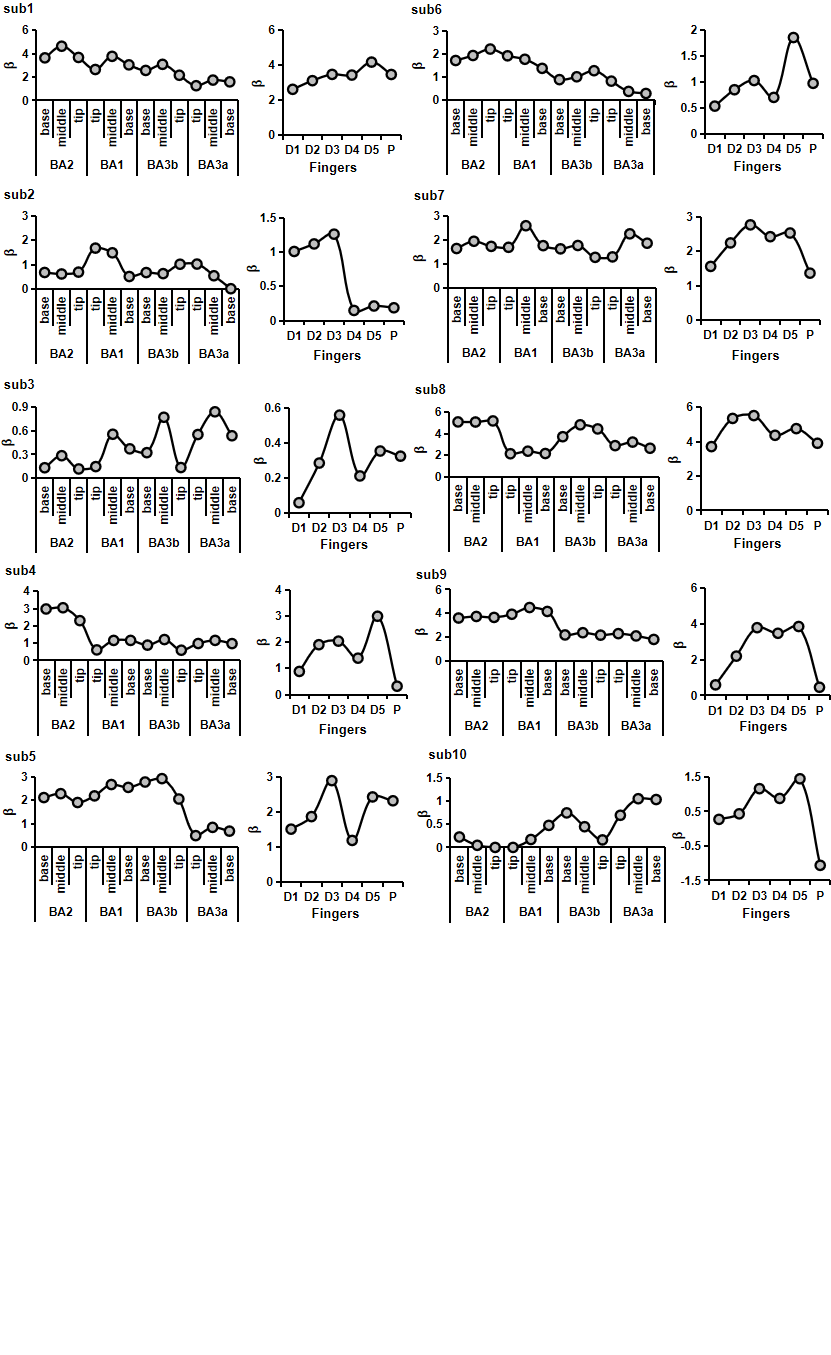
**

**Figure S2. Individual analysis results of β values**. base, proximal phalanges; middle, middle phalanges; tip, distal phalanges.

**
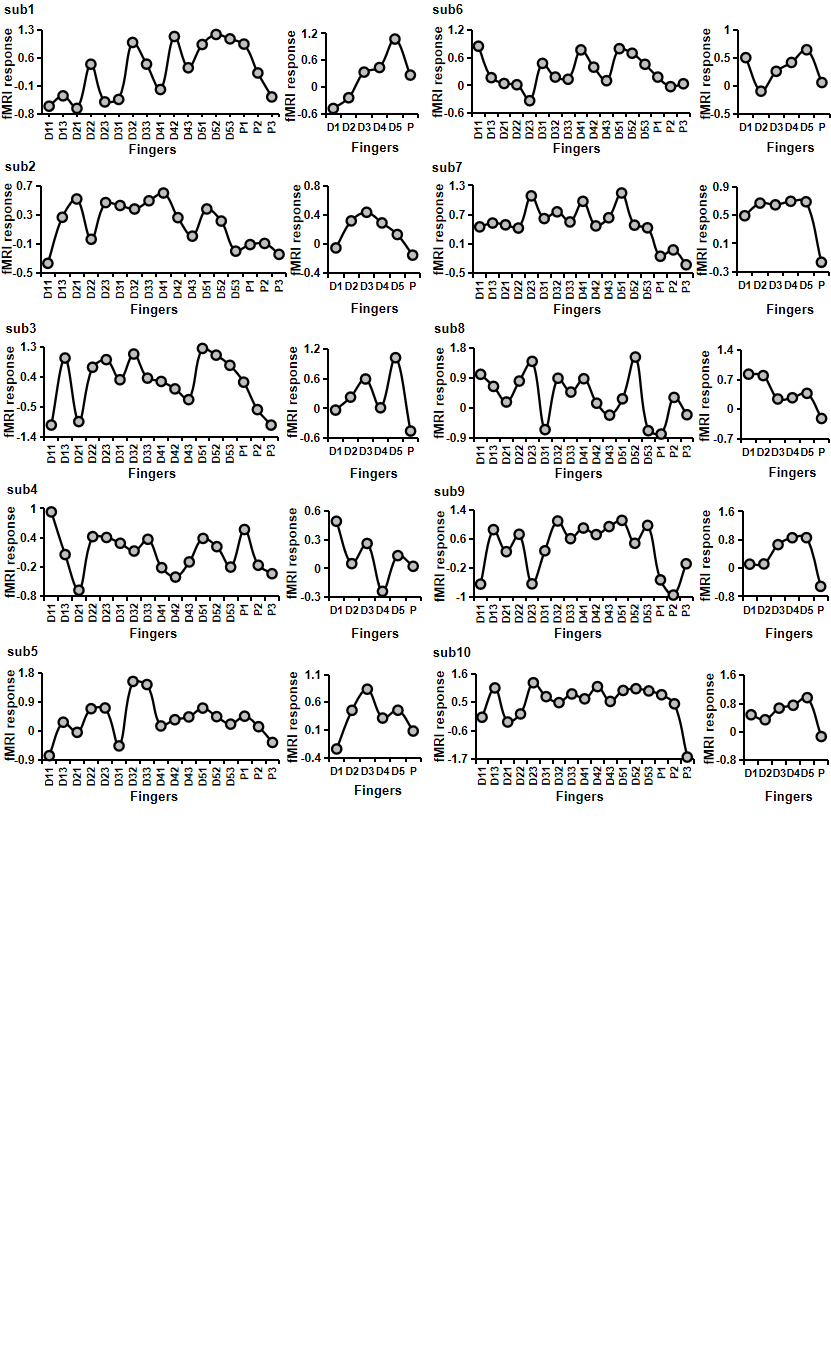
**

**Figure S3.** **Individual analysis results of the fMRI response.** In the plot of fMRI responses, the vertical axis represents fMRI response values and the horizontal axis represents fingers and palms (or phalanges). D*1, proximal phalanges; D*2, middle phalanges; D*3, distal phalanges. P1, P2, and P3 are the averages of the three stimulus positions in the first, second, and third rows of the palm, respectively.

**
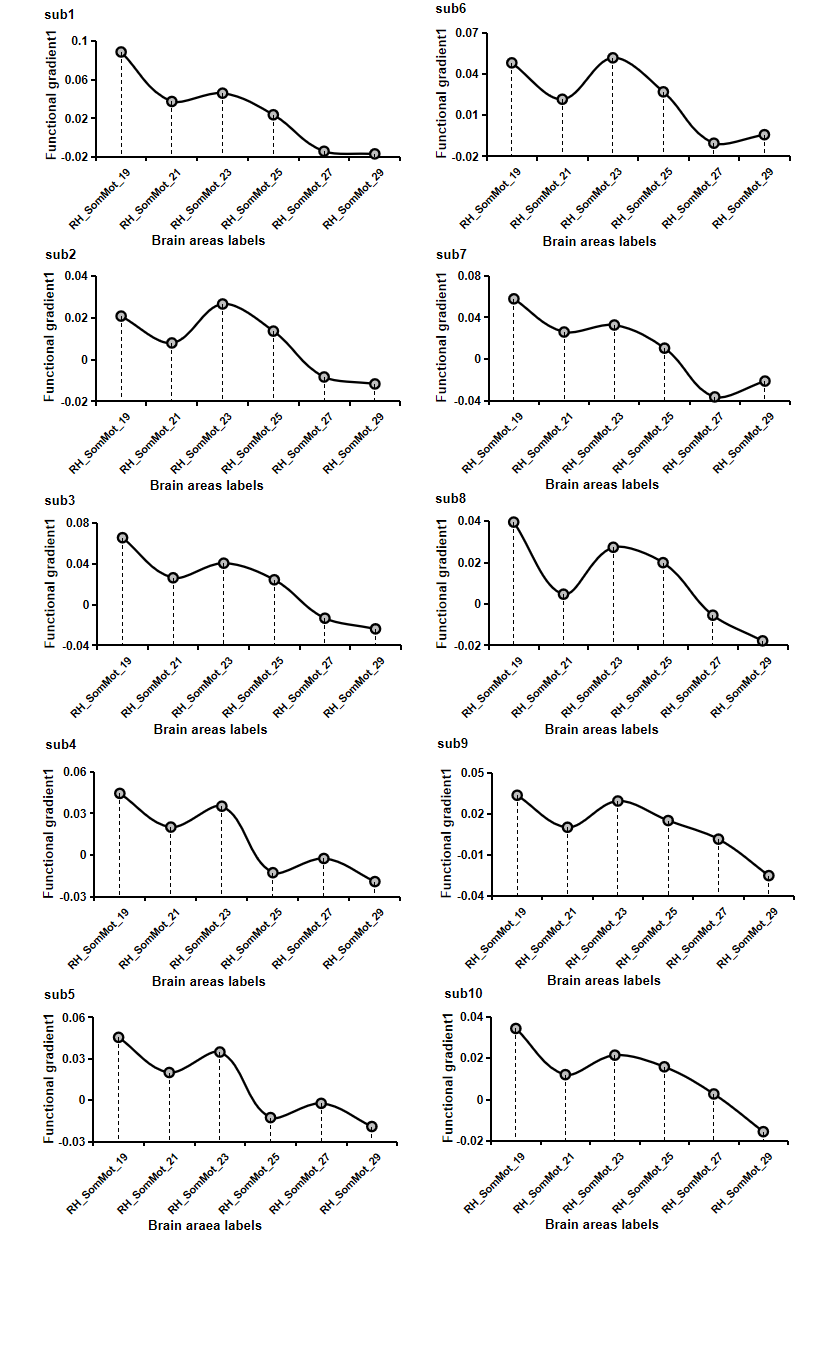
**

**Figure S4. Individual analysis results of the principal functional gradient values.**

**
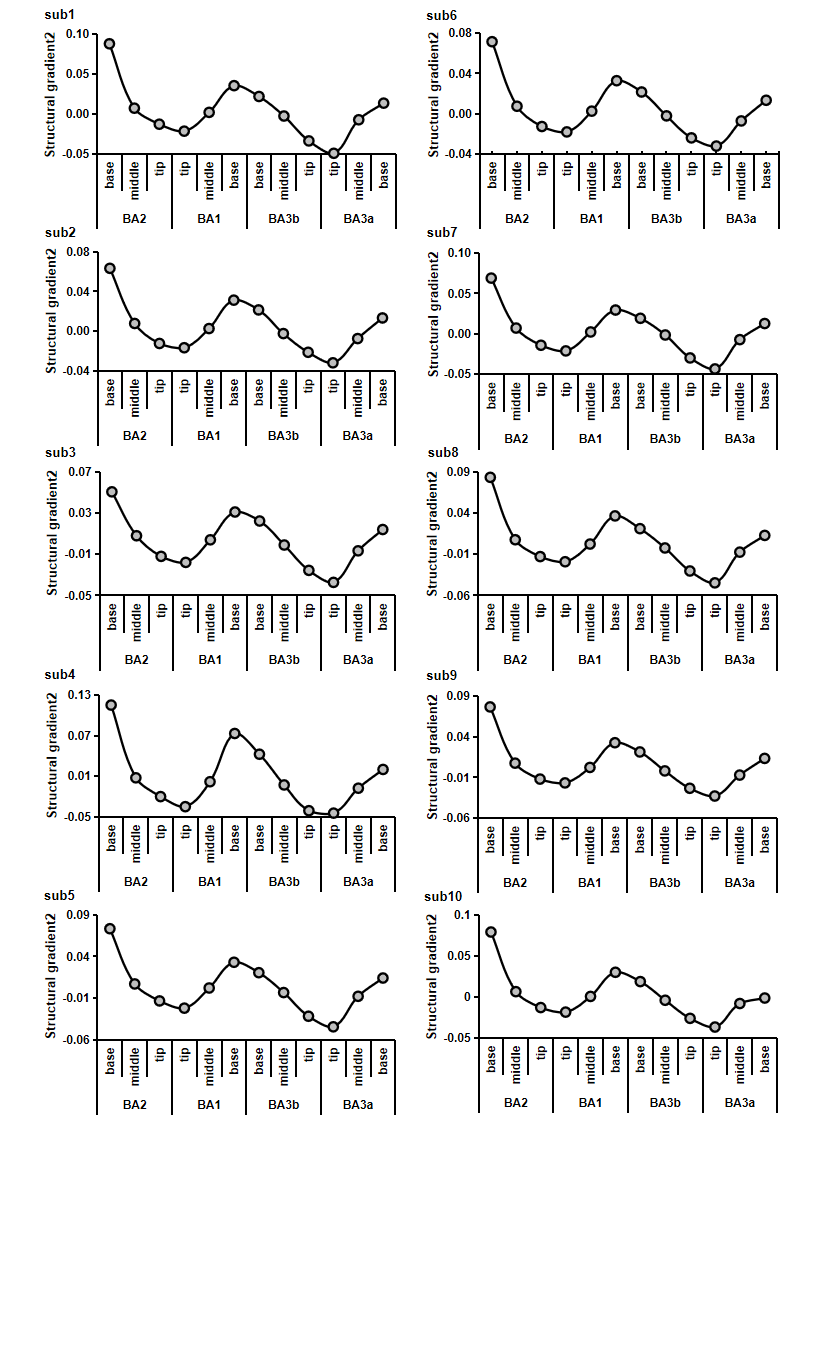
**

**Figure S5. Individual analysis results of the secondary structural gradient** **values.** Structural gradient2, secondary structural gradient.

**Video S1. Tactile experiment video.** This video introduces the entire process of experimental data collection, including equipment debugging, parameter setting, and the usage methods of software and hardware.
